# Supplementary material for: Annotation of the Protein Coding Regions of the Equine Genome
Source: PubMed Central journal article supplement (PMC4481266; doi:10.1371/journal.pone.0124375), 2015-06-24
Supplement: pone.0124375.s002.pdf [file pone.0124375.s002.pdf]

## Supplemental File (Hestand et al. 2014 “Annotation of the Protein Coding Regions of the Equine Genome”)

### Samples: (equal relative contribution to RNA pool)

|                                    |                                |                                          |
|------------------------------------|--------------------------------|------------------------------------------|
| Adipose Tissue, H1                 | Epididymus, H6                 | Retina, H1                               |
| Adrenal Cortex, H1                 | Hoof (germinal epithelium), H1 | Salivary Gland, H8                       |
| Adrenal Medulla, H1                | Kidney, H1                     | Skin (full thickness), H1                |
| Aorta, H1                          | Large Intestine, H1            | Spinal Cord, H1                          |
| Articular Cartilage (foal), H2     | Liver, H1                      | Spinal Root Ganglia, H1                  |
| Bladder, H1                        | Lung, H1                       | Spleen (red pulp), H1                    |
| Bone, H1                           | Lymph Node, H1                 | Spleen (white pulp), H1                  |
| Bone Marrow, H1                    | Lymphocytes (activated), H7    | Stomach, H1                              |
| Cecum, H1                          | Muscle (cardiac), H1           | Synovial Membrane, H10                   |
| Cerebrum, H1                       | Muscle (skeletal, tongue), H6  | Tendon (super digital flexor, foal), H11 |
| Cornea, H1                         | Muscle (skeletal), H1          | Testes, H6                               |
| Embryo (whole embryo, 34 days), H3 | Muscle (smooth), H1            | Thymus, H1                               |
| Endometrium (pregnant day 16), H4  | Ovary, H1                      | Vena Cava, H1                            |
| Endometrium (pregnant day 50), H5  | Pancreas, H8                   |                                          |
|                                    | Pituitary (anterior), H1       |                                          |
|                                    | Pituitary (posterior), H1      |                                          |
|                                    | Placental Villous, H9          |                                          |

H numbers indicate the horse from which the sample originated. Samples were from sexually mature young adult horses unless otherwise indicated.

### Pooled Sample RNA Quantitation and Purity (Nanodrop)

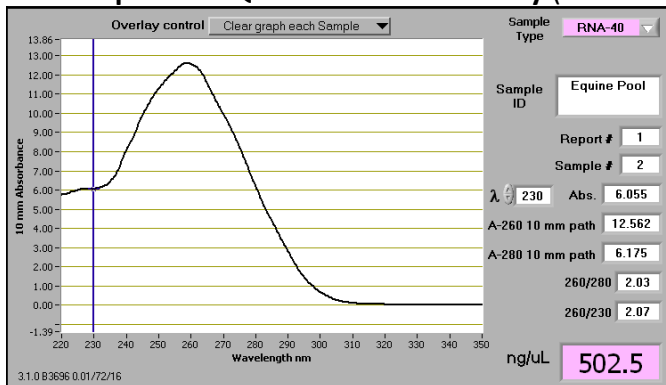

### Pooled Sample RNA Integrity (Agilent Bioanalyzer)

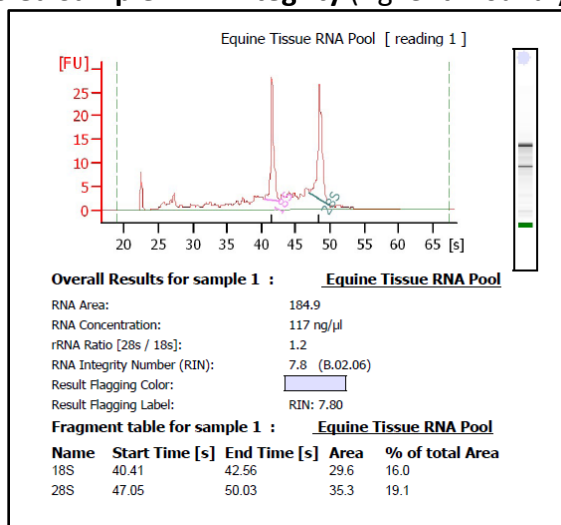

### Adipose Tissue

Integrity:

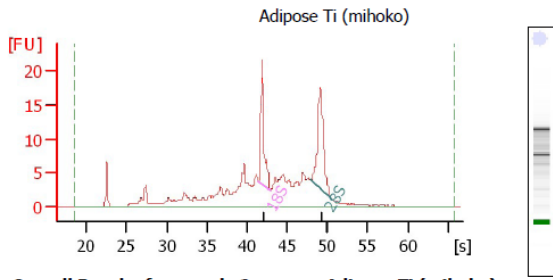

Overall Results for sample 2 : Adipose Ti (mihoko)

RNA Area: 194.1  
 RNA Concentration: 150 ng/μl  
 rRNA Ratio [28s / 18s]: 1.2  
 RNA Integrity Number (RIN): 6.8 (B.02.06)  
 Result Flagging Color:    
 Result Flagging Label: RIN: 6.80

Fragment table for sample 2 : Adipose Ti (mihoko)

| Name | Start Time [s] | End Time [s] | Area | % of total Area |
|------|----------------|--------------|------|-----------------|
| 18S  | 41.38          | 42.85        | 21.2 | 10.9            |
| 28S  | 47.96          | 50.63        | 26.2 | 13.5            |

Quantitation and Purity:

260/280: 2.08

260/230: 1.94

Concentration (ng/μl): 308

### Adrenal Medulla

Integrity:

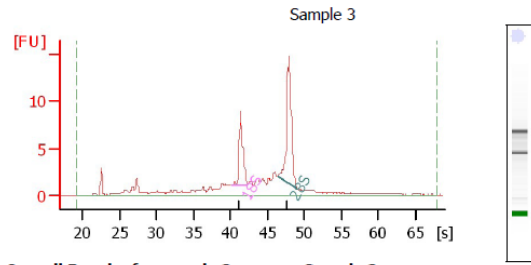

Overall Results for sample 3 : Sample 3

RNA Area: 95.5  
 RNA Concentration: 137 ng/μl  
 rRNA Ratio [28s / 18s]: 1.9  
 RNA Integrity Number (RIN): 8.4 (B.02.06)  
 Result Flagging Color:    
 Result Flagging Label: RIN: 8.40

Fragment table for sample 3 : Sample 3

| Name | Start Time [s] | End Time [s] | Area | % of total Area |
|------|----------------|--------------|------|-----------------|
| 18S  | 40.13          | 42.29        | 11.2 | 11.7            |
| 28S  | 46.38          | 49.09        | 20.8 | 21.8            |

Quantitation and Purity:

260/280: 2.02

260/230: 2.17

Concentration (ng/μl): 500

### Adrenal Cortex

Integrity:

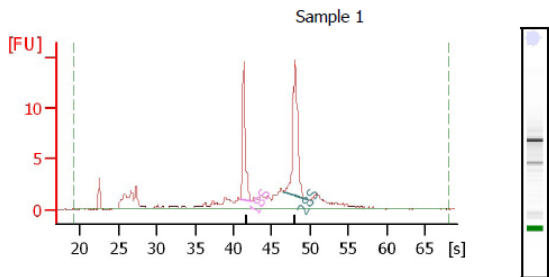

Overall Results for sample 1 : Sample 1

RNA Area: 89.3  
 RNA Concentration: 128 ng/μl  
 rRNA Ratio [28s / 18s]: 1.5  
 RNA Integrity Number (RIN): 8.5 (B.02.06)  
 Result Flagging Color:    
 Result Flagging Label: RIN: 8.50

Fragment table for sample 1 : Sample 1

| Name | Start Time [s] | End Time [s] | Area | % of total Area |
|------|----------------|--------------|------|-----------------|
| 18S  | 40.90          | 42.38        | 13.9 | 15.6            |
| 28S  | 46.53          | 49.69        | 20.6 | 23.0            |

Quantitation and Purity:

260/280: 1.92

260/230: 2.17

Concentration (ng/μl): 500

### Aorta

Integrity:

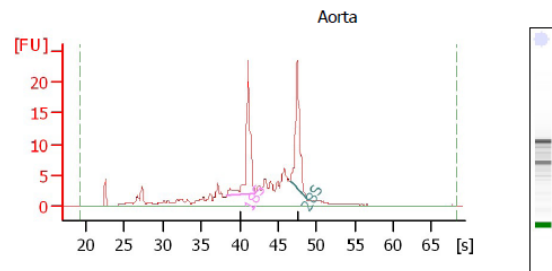

Overall Results for sample 2 : Aorta

RNA Area: 170.8  
 RNA Concentration: 206 ng/μl  
 rRNA Ratio [28s / 18s]: 0.9  
 RNA Integrity Number (RIN): 8.1 (B.02.06)  
 Result Flagging Color:    
 Result Flagging Label: RIN: 8.10

Fragment table for sample 2 : Aorta

| Name | Start Time [s] | End Time [s] | Area | % of total Area |
|------|----------------|--------------|------|-----------------|
| 18S  | 38.32          | 42.08        | 32.1 | 18.8            |
| 28S  | 46.53          | 48.71        | 27.6 | 16.1            |

Quantitation and Purity:

260/280: 1.90

260/230: 2.07

Concentration (ng/μl): 500

## Articular Cartilage (foal)

Integrity:

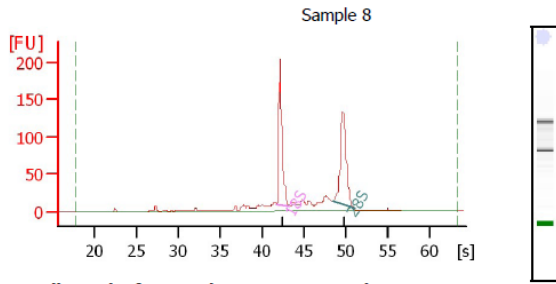

### Overall Results for sample 8 : Sample 8

RNA Area: 786.1  
 RNA Concentration: 239 ng/μl  
 rRNA Ratio [28s / 18s]: 1.2  
 RNA Integrity Number (RIN): 8.8 (B.02.06)  
 Result Flagging Color:    
 Result Flagging Label: RIN: 8.80

### Fragment table for sample 8 : Sample 8

| Name | Start Time [s] | End Time [s] | Area  | % of total Area |
|------|----------------|--------------|-------|-----------------|
| 18S  | 41.83          | 43.35        | 184.7 | 23.5            |
| 28S  | 48.54          | 51.11        | 214.4 | 27.3            |

Quantitation and Purity:

260/280: 2.07

260/230: 2.14

Concentration (ng/μl): 199.2

## Bone

Integrity:

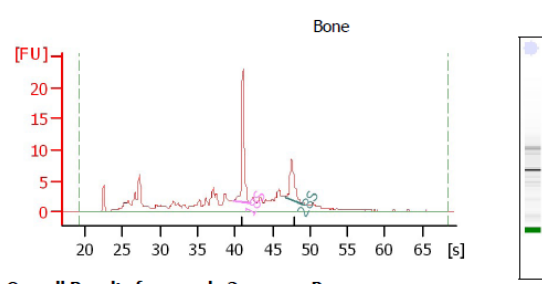

### Overall Results for sample 3 : Bone

RNA Area: 148.0  
 RNA Concentration: 178 ng/μl  
 rRNA Ratio [28s / 18s]: 0.4  
 RNA Integrity Number (RIN): 6.7 (B.02.06)  
 Result Flagging Color:    
 Result Flagging Label: RIN: 6.70

### Fragment table for sample 3 : Bone

| Name | Start Time [s] | End Time [s] | Area | % of total Area |
|------|----------------|--------------|------|-----------------|
| 18S  | 39.65          | 41.98        | 21.5 | 14.5            |
| 28S  | 46.73          | 49.16        | 9.1  | 6.1             |

Quantitation and Purity:

260/280: 1.97

260/230: 2.08

Concentration (ng/μl): 500

## Bladder

Integrity:

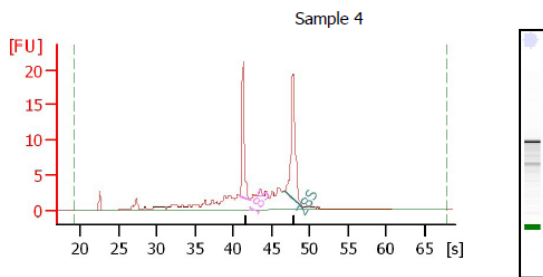

### Overall Results for sample 4 : Sample 4

RNA Area: 113.6  
 RNA Concentration: 163 ng/μl  
 rRNA Ratio [28s / 18s]: 1.3  
 RNA Integrity Number (RIN): 7.5 (B.02.06)  
 Result Flagging Color:    
 Result Flagging Label: RIN: 7.50

### Fragment table for sample 4 : Sample 4

| Name | Start Time [s] | End Time [s] | Area | % of total Area |
|------|----------------|--------------|------|-----------------|
| 18S  | 40.86          | 42.14        | 17.0 | 14.9            |
| 28S  | 46.72          | 49.04        | 22.5 | 19.8            |

Quantitation and Purity:

260/280: 2.05

260/230: 1.87

Concentration (ng/μl): 479

## Bone Marrow

Integrity:

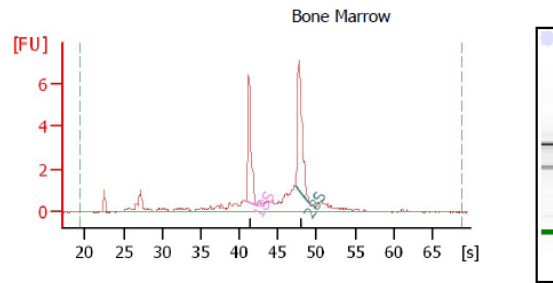

### Overall Results for sample 5 : Bone Marrow

RNA Area: 38.7  
 RNA Concentration: 181 ng/μl  
 rRNA Ratio [28s / 18s]: 1.2  
 RNA Integrity Number (RIN): 8.4 (A.01.01)  
 Result Flagging Color:    
 Result Flagging Label: RIN: 8.40

### Fragment table for sample 5 : Bone Marrow

| Name | Start Time [s] | End Time [s] | Area | % of total Area |
|------|----------------|--------------|------|-----------------|
| 18S  | 40.76          | 42.26        | 7.0  | 18.0            |
| 28S  | 47.25          | 49.04        | 8.5  | 22.0            |

Quantitation and Purity:

260/280: 2.02

260/230: 2.2

Concentration (ng/μl): 500

## Cecum

Integrity:

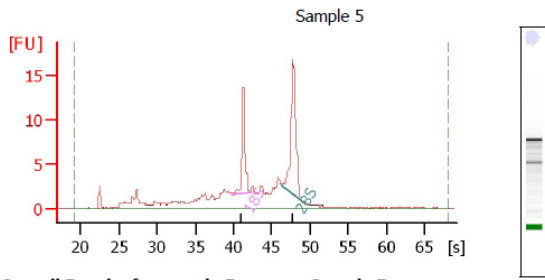

### Overall Results for sample 5 : Sample 5

RNA Area: 123.3  
RNA Concentration: 177 ng/ $\mu$ l  
rRNA Ratio [28s / 18s]: 1.7  
RNA Integrity Number (RIN): 7.6 (B.02.06)  
Result Flagging Color:    
Result Flagging Label: RIN: 7.60

### Fragment table for sample 5 : Sample 5

| Name | Start Time [s] | End Time [s] | Area | % of total Area |
|------|----------------|--------------|------|-----------------|
| 18S  | 39.82          | 42.19        | 13.4 | 10.8            |
| 28S  | 46.33          | 49.24        | 23.0 | 18.6            |

Quantitation and Purity:

260/280: 2.00

260/230: 2.06

Concentration (ng/ $\mu$ l): 500

## Cornea

Integrity:

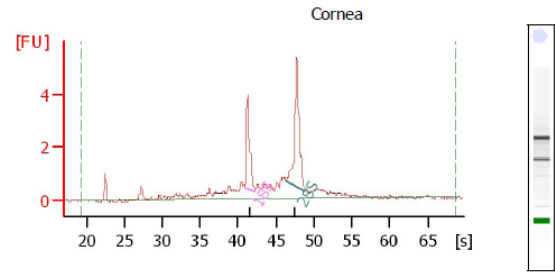

### Overall Results for sample 4 : Cornea

RNA Area: 31.5  
RNA Concentration: 147 ng/ $\mu$ l  
rRNA Ratio [28s / 18s]: 1.7  
RNA Integrity Number (RIN): 7.9 (A.01.01)  
Result Flagging Color:    
Result Flagging Label: RIN: 7.90

### Fragment table for sample 4 : Cornea

| Name | Start Time [s] | End Time [s] | Area | % of total Area |
|------|----------------|--------------|------|-----------------|
| 18S  | 40.87          | 42.26        | 4.2  | 13.3            |
| 28S  | 46.34          | 48.93        | 6.9  | 22.0            |

Quantitation and Purity:

260/280: 2.07

260/230: 2.24

Concentration (ng/ $\mu$ l): 500

## Cerebrum

Integrity:

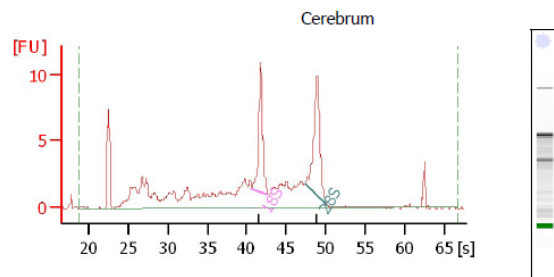

### Overall Results for sample 3 : Cerebrum

RNA Area: 116.7  
RNA Concentration: 68 ng/ $\mu$ l  
rRNA Ratio [28s / 18s]: 1.3  
RNA Integrity Number (RIN): 7.2 (B.02.06)  
Result Flagging Color:    
Result Flagging Label: RIN: 7.20

### Fragment table for sample 3 : Cerebrum

| Name | Start Time [s] | End Time [s] | Area | % of total Area |
|------|----------------|--------------|------|-----------------|
| 18S  | 40.69          | 42.77        | 13.1 | 11.2            |
| 28S  | 47.42          | 50.27        | 16.5 | 14.1            |

Quantitation and Purity:

260/280: 2.04

260/230: 2.15

Concentration (ng/ $\mu$ l): 500

## Embryo (whole embryo, 34 days)

Integrity:

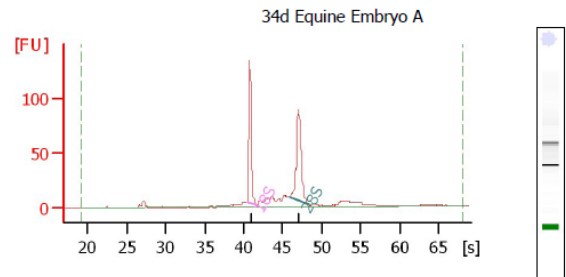

### Overall Results for sample 2 : 34d Equine Embryo A

RNA Area: 447.9  
RNA Concentration: 359 ng/ $\mu$ l  
rRNA Ratio [28s / 18s]: 1.0  
RNA Integrity Number (RIN): 9.6 (B.02.06)  
Result Flagging Color:    
Result Flagging Label: RIN: 9.60

### Fragment table for sample 2 : 34d Equine Embryo A

| Name | Start Time [s] | End Time [s] | Area  | % of total Area |
|------|----------------|--------------|-------|-----------------|
| 18S  | 40.36          | 41.60        | 125.4 | 28.0            |
| 28S  | 45.74          | 48.36        | 130.9 | 29.2            |

Quantitation and Purity:

260/280: 2.00

260/230: 2.20

Concentration (ng/ $\mu$ l): 1249.3

## Endometrium (pregnant day 16)

Integrity:

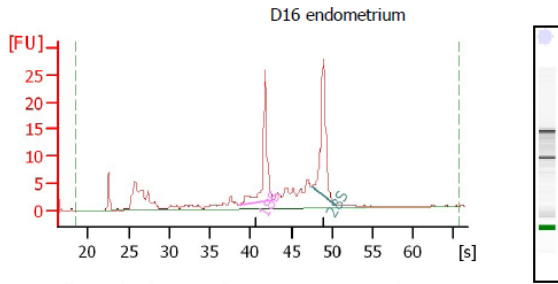

### Overall Results for sample 4 : D16 endometrium

RNA Area: 181.6  
 RNA Concentration: 140 ng/μl  
 rRNA Ratio [28s / 18s]: 1.0  
 RNA Integrity Number (RIN): 9 (B.02.06)  
 Result Flagging Color:    
 Result Flagging Label: RIN:9

### Fragment table for sample 4 : D16 endometrium

| Name | Start Time [s] | End Time [s] | Area | % of total Area |
|------|----------------|--------------|------|-----------------|
| 18S  | 38.63          | 42.81        | 36.6 | 20.2            |
| 28S  | 47.52          | 50.42        | 37.4 | 20.6            |

Quantitation and Purity:

260/280: 1.98

260/230: 2.31

Concentration (ng/μl): 484

## Epididymus

Integrity:

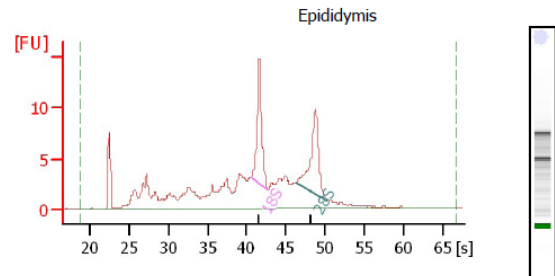

### Overall Results for sample 4 : Epididymis

RNA Area: 177.8  
 RNA Concentration: 104 ng/μl  
 rRNA Ratio [28s / 18s]: 1.0  
 RNA Integrity Number (RIN): 6.9 (B.02.06)  
 Result Flagging Color:    
 Result Flagging Label: RIN: 6.90

### Fragment table for sample 4 : Epididymis

| Name | Start Time [s] | End Time [s] | Area | % of total Area |
|------|----------------|--------------|------|-----------------|
| 18S  | 40.55          | 42.68        | 19.6 | 11.0            |
| 28S  | 46.31          | 50.27        | 20.2 | 11.4            |

Quantitation and Purity:

260/280: 1.88

260/230: 2.07

Concentration (ng/μl): 500

## Endometrium (pregnant day 50)

Integrity:

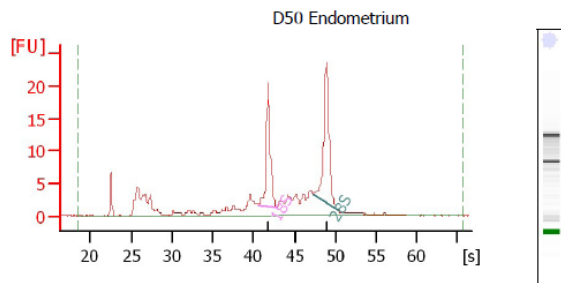

### Overall Results for sample 5 : D50 Endometrium

RNA Area: 165.2  
 RNA Concentration: 127 ng/μl  
 rRNA Ratio [28s / 18s]: 1.3  
 RNA Integrity Number (RIN): 8.4 (B.02.06)  
 Result Flagging Color:    
 Result Flagging Label: RIN: 8.40

### Fragment table for sample 5 : D50 Endometrium

| Name | Start Time [s] | End Time [s] | Area | % of total Area |
|------|----------------|--------------|------|-----------------|
| 18S  | 40.62          | 42.81        | 26.9 | 16.3            |
| 28S  | 47.33          | 50.47        | 33.9 | 20.5            |

Quantitation and Purity:

260/280: 1.97

260/230: 2.31

Concentration (ng/μl): 465.6

## Hoof (germinal epithelium)

Integrity:

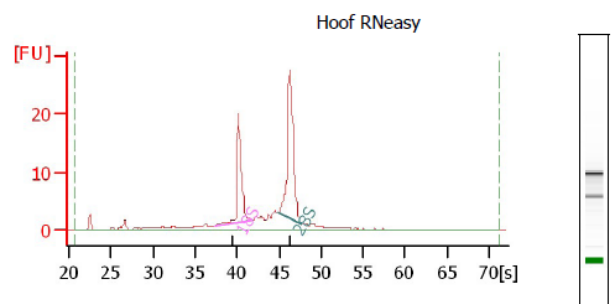

### Overall Results for sample 12 : Hoof RNeasy

RNA Area: 144.9  
 RNA Concentration: 187 ng/μl  
 rRNA Ratio [28s / 18s]: 1.7  
 RNA Integrity Number (RIN): 9.5 (B.02.06)

### Fragment table for sample 12 : Hoof RNeasy

| Name | Start Time [s] | End Time [s] | Area | % of total Area |
|------|----------------|--------------|------|-----------------|
| 18S  | 37.26          | 41.75        | 28.0 | 19.3            |
| 28S  | 44.90          | 47.68        | 46.6 | 32.1            |

Quantitation and Purity:

260/280: 1.94

260/230: 2.17

Concentration (ng/μl): 500

## Kidney

Integrity:

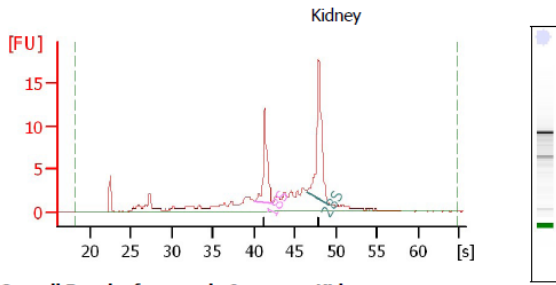

### Overall Results for sample 9 : Kidney

RNA Area: 108.1  
RNA Concentration: 99 ng/ $\mu$ l  
rRNA Ratio [28s / 18s]: 1.5  
RNA Integrity Number (RIN): 8.3 (B.02.06)  
Result Flagging Color:    
Result Flagging Label: RIN: 8.30

### Fragment table for sample 9 : Kidney

| Name | Start Time [s] | End Time [s] | Area | % of total Area |
|------|----------------|--------------|------|-----------------|
| 18S  | 40.07          | 42.32        | 15.1 | 14.0            |
| 28S  | 46.50          | 49.27        | 23.1 | 21.4            |

Quantitation and Purity:

260/280: 2.02

260/230: 2.05

Concentration (ng/ $\mu$ l): 500

## Liver

Integrity:

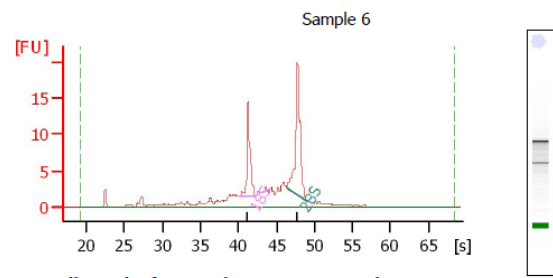

### Overall Results for sample 6 : Sample 6

RNA Area: 112.9  
RNA Concentration: 162 ng/ $\mu$ l  
rRNA Ratio [28s / 18s]: 1.6  
RNA Integrity Number (RIN): 8.3 (B.02.06)  
Result Flagging Color:    
Result Flagging Label: RIN: 8.30

### Fragment table for sample 6 : Sample 6

| Name | Start Time [s] | End Time [s] | Area | % of total Area |
|------|----------------|--------------|------|-----------------|
| 18S  | 40.24          | 42.27        | 16.3 | 14.4            |
| 28S  | 46.29          | 49.11        | 26.6 | 23.6            |

Quantitation and Purity:

260/280: 2.11

260/230: 1.89

Concentration (ng/ $\mu$ l): 500

## Large Intestine

Integrity:

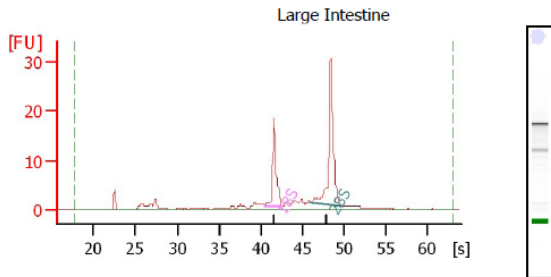

### Overall Results for sample 4 : Large Intestine

RNA Area: 115.4  
RNA Concentration: 105 ng/ $\mu$ l  
rRNA Ratio [28s / 18s]: 1.9  
RNA Integrity Number (RIN): 9.4 (B.02.06)  
Result Flagging Color:    
Result Flagging Label: RIN: 9.40

### Fragment table for sample 4 : Large Intestine

| Name | Start Time [s] | End Time [s] | Area | % of total Area |
|------|----------------|--------------|------|-----------------|
| 18S  | 40.48          | 42.63        | 20.6 | 17.9            |
| 28S  | 45.96          | 49.79        | 40.0 | 34.7            |

Quantitation and Purity:

260/280: 2.07

260/230: 2.14

Concentration (ng/ $\mu$ l): 1000

## Lung

Integrity:

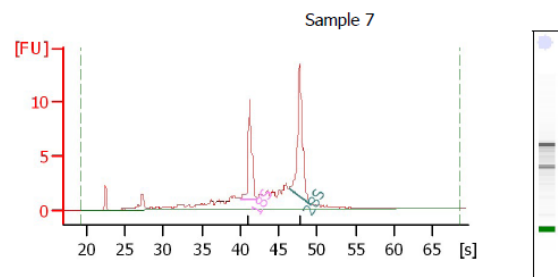

### Overall Results for sample 7 : Sample 7

RNA Area: 82.1  
RNA Concentration: 118 ng/ $\mu$ l  
rRNA Ratio [28s / 18s]: 1.5  
RNA Integrity Number (RIN): 8.1 (B.02.06)  
Result Flagging Color:    
Result Flagging Label: RIN: 8.10

### Fragment table for sample 7 : Sample 7

| Name | Start Time [s] | End Time [s] | Area | % of total Area |
|------|----------------|--------------|------|-----------------|
| 18S  | 40.08          | 42.22        | 12.3 | 15.0            |
| 28S  | 46.29          | 49.27        | 18.6 | 22.6            |

Quantitation and Purity:

260/280: 1.94

260/230: 2.29

Concentration (ng/ $\mu$ l): 500

## Lymph Node

Integrity:

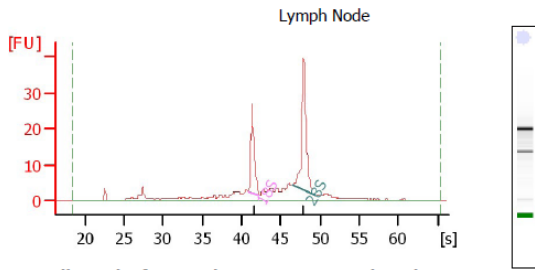

### Overall Results for sample 10 : Lymph Node

RNA Area: 196.7  
RNA Concentration: 179 ng/ $\mu$ l  
rRNA Ratio [28s / 18s]: 1.9  
RNA Integrity Number (RIN): 8.5 (B.02.06)  
Result Flagging Color:    
Result Flagging Label: RIN: 8.50

### Fragment table for sample 10 : Lymph Node

| Name | Start Time [s] | End Time [s] | Area | % of total Area |
|------|----------------|--------------|------|-----------------|
| 18S  | 40.88          | 42.30        | 27.0 | 13.7            |
| 28S  | 46.42          | 49.36        | 50.3 | 25.6            |

Quantitation and Purity:

260/280: 2.01

260/230: 2.12

Concentration (ng/ $\mu$ l): 410

## Muscle (cardiac)

Integrity:

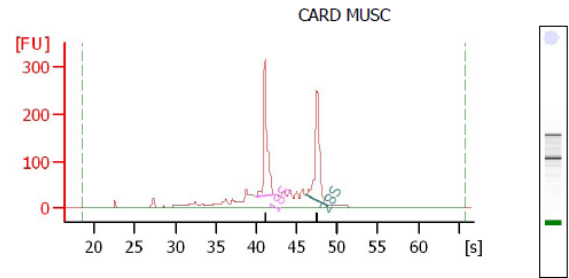

### Overall Results for sample 3 : CARD MUSC

RNA Area: 1,564.3  
RNA Concentration: 649 ng/ $\mu$ l  
rRNA Ratio [28s / 18s]: 0.9  
RNA Integrity Number (RIN): 8 (B.02.06)  
Result Flagging Color:    
Result Flagging Label: RIN: 8

### Fragment table for sample 3 : CARD MUSC

| Name | Start Time [s] | End Time [s] | Area  | % of total Area |
|------|----------------|--------------|-------|-----------------|
| 18S  | 39.99          | 42.19        | 349.5 | 22.3            |
| 28S  | 46.10          | 48.72        | 298.1 | 19.1            |

Quantitation and Purity:

260/280: 2.11

260/230: 2.24

Concentration (ng/ $\mu$ l): 1072

## Lymphocytes (activated)

Integrity:

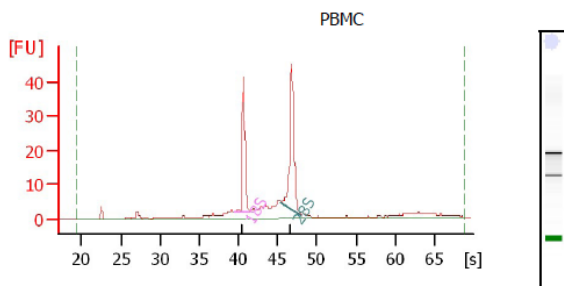

### Overall Results for sample 8 : PBMC

RNA Area: 175.3  
RNA Concentration: 84 ng/ $\mu$ l  
rRNA Ratio [28s / 18s]: 1.7  
RNA Integrity Number (RIN): 9.2 (B.02.06)  
Result Flagging Color:    
Result Flagging Label: RIN: 9.20

### Fragment table for sample 8 : PBMC

| Name | Start Time [s] | End Time [s] | Area | % of total Area |
|------|----------------|--------------|------|-----------------|
| 18S  | 39.56          | 41.51        | 32.3 | 18.4            |
| 28S  | 45.50          | 48.04        | 55.1 | 31.4            |

Quantitation and Purity:

260/280: 1.99

260/230: 2.00

Concentration (ng/ $\mu$ l): 500

## Muscle (skeletal, tongue)

Integrity:

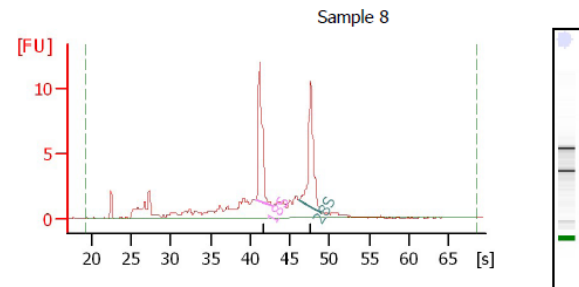

### Overall Results for sample 8 : Sample 8

RNA Area: 79.2  
RNA Concentration: 114 ng/ $\mu$ l  
rRNA Ratio [28s / 18s]: 0.9  
RNA Integrity Number (RIN): 7.6 (B.02.06)  
Result Flagging Color:    
Result Flagging Label: RIN: 7.60

### Fragment table for sample 8 : Sample 8

| Name | Start Time [s] | End Time [s] | Area | % of total Area |
|------|----------------|--------------|------|-----------------|
| 18S  | 40.68          | 42.81        | 15.2 | 19.2            |
| 28S  | 46.09          | 49.07        | 14.2 | 17.9            |

Quantitation and Purity:

260/280: 2.08

260/230: 2.18

Concentration (ng/ $\mu$ l): 500

## Muscle (skeletal)

Integrity:

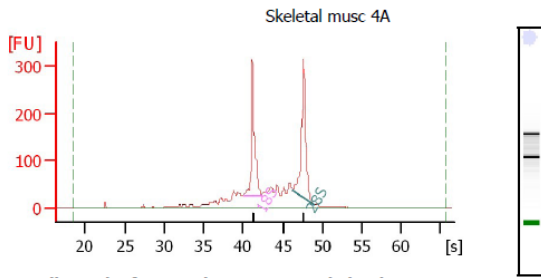

Overall Results for sample 11 : Skeletal musc 4A

RNA Area: 1,659.7  
RNA Concentration: 469 ng/μl  
rRNA Ratio [28s / 18s]: 1.1  
RNA Integrity Number (RIN): 8.1 (B.02.06)  
Result Flagging Color:    
Result Flagging Label: RIN: 8.10

Fragment table for sample 11 : Skeletal musc 4A

| Name | Start Time [s] | End Time [s] | Area  | % of total Area |
|------|----------------|--------------|-------|-----------------|
| 18S  | 40.10          | 42.29        | 324.5 | 19.5            |
| 28S  | 46.28          | 48.85        | 355.9 | 21.4            |

Quantitation and Purity:

260/280: 2.08

260/230: 2.11

Concentration (ng/μl): 492.28

## Ovary

Integrity:

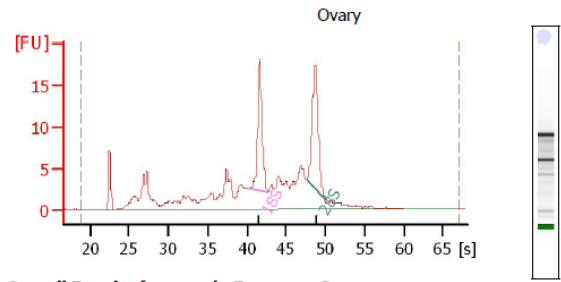

Overall Results for sample 5 : Ovary

RNA Area: 199.3  
RNA Concentration: 117 ng/μl  
rRNA Ratio [28s / 18s]: 1.1  
RNA Integrity Number (RIN): 7.2 (B.02.06)  
Result Flagging Color:    
Result Flagging Label: RIN: 7.20

Fragment table for sample 5 : Ovary

| Name | Start Time [s] | End Time [s] | Area | % of total Area |
|------|----------------|--------------|------|-----------------|
| 18S  | 40.38          | 42.67        | 24.7 | 12.4            |
| 28S  | 47.58          | 50.05        | 26.7 | 13.4            |

Quantitation and Purity:

260/280: 1.97

260/230: 2.19

Concentration (ng/μl): 500

## Muscle (smooth)

Integrity:

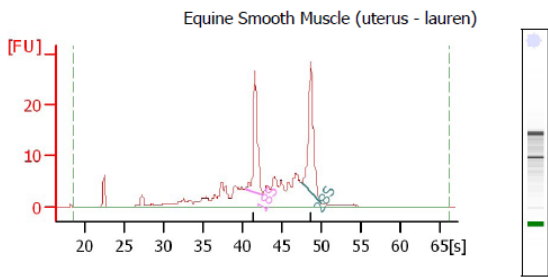

Overall Results for sample 7 : Equine Smooth Muscle (uterus - la

RNA Area: 217.5  
RNA Concentration: 168 ng/μl  
rRNA Ratio [28s / 18s]: 1.2  
RNA Integrity Number (RIN): 7.4 (B.02.06)  
Result Flagging Color:    
Result Flagging Label: RIN: 7.40

Fragment table for sample 7 : Equine Smooth Muscle (uterus - la

| Name | Start Time [s] | End Time [s] | Area | % of total Area |
|------|----------------|--------------|------|-----------------|
| 18S  | 40.44          | 42.60        | 31.8 | 14.6            |
| 28S  | 47.59          | 50.09        | 37.4 | 17.2            |

Quantitation and Purity:

260/280: 2.08

260/230: 2.20

Concentration (ng/μl): 472

## Pancreas

Integrity:

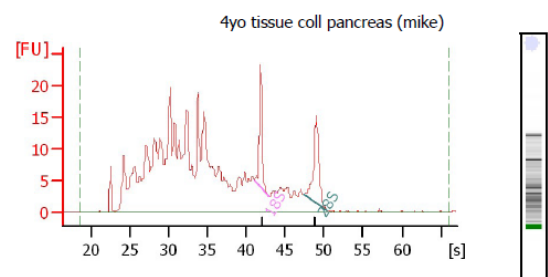

Overall Results for sample 1 : 4yo tissue coll pancreas (mike)

RNA Area: 522.4  
RNA Concentration: 402 ng/μl  
rRNA Ratio [28s / 18s]: 1.2  
RNA Integrity Number (RIN): 4.8 (B.02.06)  
Result Flagging Color:    
Result Flagging Label: RIN: 4.80

Fragment table for sample 1 : 4yo tissue coll pancreas (mike)

| Name | Start Time [s] | End Time [s] | Area | % of total Area |
|------|----------------|--------------|------|-----------------|
| 18S  | 41.03          | 42.89        | 18.6 | 3.6             |
| 28S  | 47.39          | 50.31        | 21.5 | 4.1             |

Quantitation and Purity:

260/280: 2.09

260/230: 2.20

Concentration (ng/μl): 1779



## Pituitary (anterior)

Integrity:

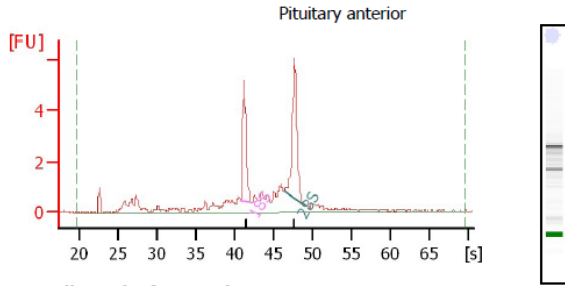

### Overall Results for sample 9 : Pituitary anterior

RNA Area: 37.5  
RNA Concentration: 175 ng/μl  
rRNA Ratio [28s / 18s]: 1.6  
RNA Integrity Number (RIN): 8.1 (A.01.01)  
Result Flagging Color:    
Result Flagging Label: RIN: 8.10

### Fragment table for sample 9 : Pituitary anterior

| Name | Start Time [s] | End Time [s] | Area | % of total Area |
|------|----------------|--------------|------|-----------------|
| 18S  | 40.71          | 42.07        | 5.0  | 13.3            |
| 28S  | 46.36          | 49.04        | 7.8  | 20.8            |

Quantitation and Purity:

260/280: 2.02

260/230: 2.27

Concentration (ng/μl): 500

## Placental Villous

Integrity:

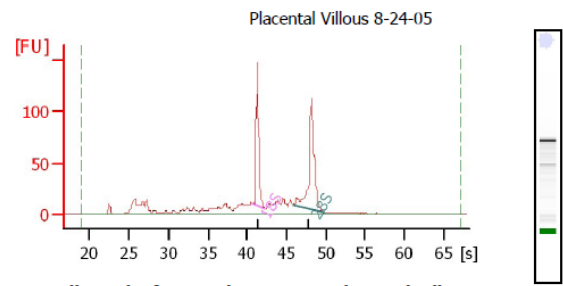

### Overall Results for sample 8 : Placental Villous 8-24-05

RNA Area: 735.8  
RNA Concentration: 446 ng/μl  
rRNA Ratio [28s / 18s]: 1.5  
RNA Integrity Number (RIN): 7.8 (B.02.06)  
Result Flagging Color:    
Result Flagging Label: RIN: 7.80

### Fragment table for sample 8 : Placental Villous 8-24-05

| Name | Start Time [s] | End Time [s] | Area  | % of total Area |
|------|----------------|--------------|-------|-----------------|
| 18S  | 40.71          | 42.22        | 113.1 | 15.4            |
| 28S  | 45.93          | 49.82        | 172.1 | 23.4            |

Quantitation and Purity:

260/280: 1.94

260/230: 2.22

Concentration (ng/μl): 1018

## Pituitary (posterior)

Integrity:

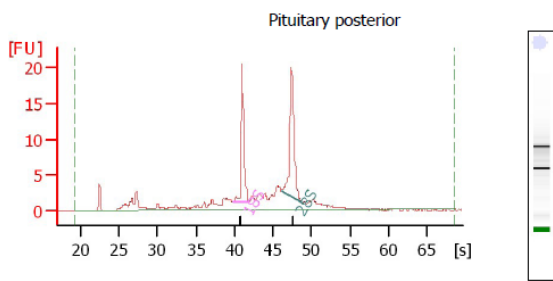

### Overall Results for sample 6 : Pituitary posterior

RNA Area: 126.2  
RNA Concentration: 152 ng/μl  
rRNA Ratio [28s / 18s]: 1.3  
RNA Integrity Number (RIN): 8.2 (B.02.06)  
Result Flagging Color:    
Result Flagging Label: RIN: 8.20

### Fragment table for sample 6 : Pituitary posterior

| Name | Start Time [s] | End Time [s] | Area | % of total Area |
|------|----------------|--------------|------|-----------------|
| 18S  | 39.88          | 41.92        | 20.5 | 16.3            |
| 28S  | 46.04          | 48.87        | 26.0 | 20.6            |

Quantitation and Purity:

260/280: 2.05

260/230: 2.24

Concentration (ng/μl): 500

## Retina

Integrity:

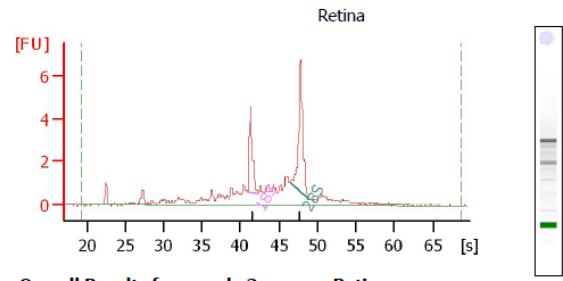

### Overall Results for sample 3 : Retina

RNA Area: 43.7  
RNA Concentration: 204 ng/μl  
rRNA Ratio [28s / 18s]: 1.8  
RNA Integrity Number (RIN): 7.7 (A.01.01)  
Result Flagging Color:    
Result Flagging Label: RIN: 7.70

### Fragment table for sample 3 : Retina

| Name | Start Time [s] | End Time [s] | Area | % of total Area |
|------|----------------|--------------|------|-----------------|
| 18S  | 40.87          | 42.31        | 4.5  | 10.2            |
| 28S  | 46.49          | 48.88        | 8.2  | 18.7            |

Quantitation and Purity:

260/280: 2.07

260/230: 2.19

Concentration (ng/μl): 500

## Salivary Gland

Integrity:

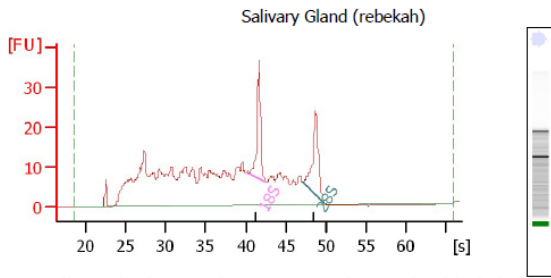

### Overall Results for sample 6 : Salivary Gland (rebekah)

RNA Area: 589.4  
RNA Concentration: 454 ng/μl  
rRNA Ratio [28s / 18s]: 1.0  
RNA Integrity Number (RIN): 5.4 (B.02.06)  
Result Flagging Color:   
Result Flagging Label: RIN: 5.40

### Fragment table for sample 6 : Salivary Gland (rebekah)

| Name | Start Time [s] | End Time [s] | Area | % of total Area |
|------|----------------|--------------|------|-----------------|
| 18S  | 39.98          | 42.42        | 33.7 | 5.7             |
| 28S  | 47.10          | 49.92        | 34.5 | 5.8             |

Quantitation and Purity:

260/280: 2.07

260/230: 2.17

Concentration (ng/μl): 3000

## Spinal Cord

Integrity:

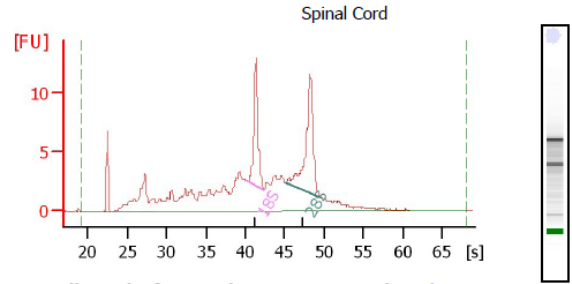

### Overall Results for sample 8 : Spinal Cord

RNA Area: 162.9  
RNA Concentration: 96 ng/μl  
rRNA Ratio [28s / 18s]: 1.5  
RNA Integrity Number (RIN): 7 (B.02.06)  
Result Flagging Color:   
Result Flagging Label: RIN:7

### Fragment table for sample 8 : Spinal Cord

| Name | Start Time [s] | End Time [s] | Area | % of total Area |
|------|----------------|--------------|------|-----------------|
| 18S  | 40.31          | 42.38        | 15.9 | 9.7             |
| 28S  | 45.10          | 49.69        | 23.4 | 14.4            |

Quantitation and Purity:

260/280: 2.01

260/230: 2.23

Concentration (ng/μl): 500

## Skin (full thickness)

Integrity:

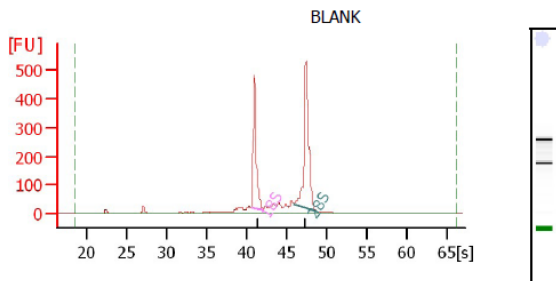

### Overall Results for sample 1 : BLANK

RNA Area: 1,910.5  
RNA Concentration: 792 ng/μl  
rRNA Ratio [28s / 18s]: 1.5  
RNA Integrity Number (RIN): 9.5 (B.02.06)  
Result Flagging Color:   
Result Flagging Label: RIN: 9.50

### Fragment table for sample 1 : BLANK

| Name | Start Time [s] | End Time [s] | Area  | % of total Area |
|------|----------------|--------------|-------|-----------------|
| 18S  | 40.63          | 42.07        | 477.6 | 25.0            |
| 28S  | 45.96          | 48.93        | 713.9 | 37.4            |

Quantitation and Purity:

260/280: 1.95

260/230: 1.89

Concentration (ng/μl): 1000

## Spinal Root Ganglia

Integrity:

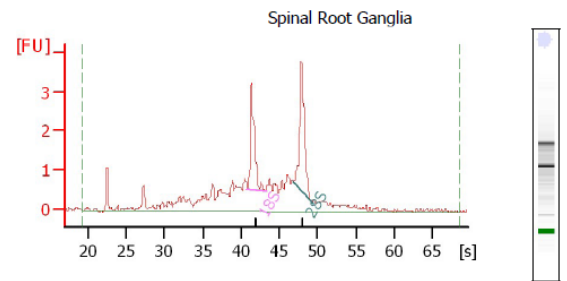

### Overall Results for sample 2 : Spinal Root Ganglia

RNA Area: 37.8  
RNA Concentration: 177 ng/μl  
rRNA Ratio [28s / 18s]: 1.2  
RNA Integrity Number (RIN): 7.1 (A.01.01)  
Result Flagging Color:   
Result Flagging Label: RIN: 7.10

### Fragment table for sample 2 : Spinal Root Ganglia

| Name | Start Time [s] | End Time [s] | Area | % of total Area |
|------|----------------|--------------|------|-----------------|
| 18S  | 40.83          | 43.21        | 4.3  | 11.2            |
| 28S  | 46.84          | 49.37        | 5.1  | 13.5            |

Quantitation and Purity:

260/280: 2.07

260/230: 2.16

Concentration (ng/μl): 500

## Spleen (red pulp)

Integrity:

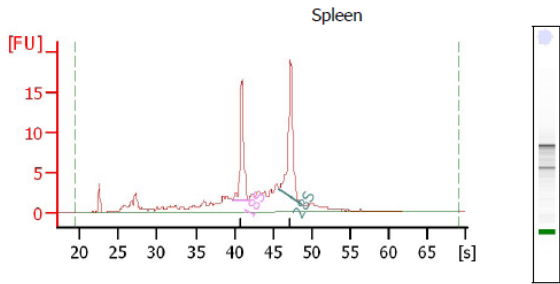

### Overall Results for sample 9 : Spleen

RNA Area: 123.0  
RNA Concentration: 148 ng/ $\mu$ l  
rRNA Ratio [28s / 18s]: 1.4  
RNA Integrity Number (RIN): 7.9 (B.02.06)  
Result Flagging Color:    
Result Flagging Label: RIN: 7.90

### Fragment table for sample 9 : Spleen

| Name | Start Time [s] | End Time [s] | Area | % of total Area |
|------|----------------|--------------|------|-----------------|
| 18S  | 39.80          | 41.85        | 17.6 | 14.3            |
| 28S  | 45.80          | 48.55        | 24.2 | 19.7            |

Quantitation and Purity:

260/280: 2.00

260/230: 2.21

Concentration (ng/ $\mu$ l): 500

## Stomach

Integrity:

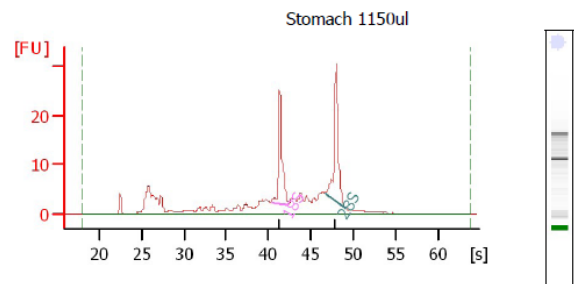

### Overall Results for sample 7 : Stomach 1150ul

RNA Area: 197.1  
RNA Concentration: 180 ng/ $\mu$ l  
rRNA Ratio [28s / 18s]: 1.3  
RNA Integrity Number (RIN): 7.8 (B.02.06)  
Result Flagging Color:    
Result Flagging Label: RIN: 7.80

### Fragment table for sample 7 : Stomach 1150ul

| Name | Start Time [s] | End Time [s] | Area | % of total Area |
|------|----------------|--------------|------|-----------------|
| 18S  | 40.32          | 42.41        | 26.3 | 13.3            |
| 28S  | 46.67          | 49.17        | 33.0 | 16.7            |

Quantitation and Purity:

260/280: 2.07

260/230: 1.83

Concentration (ng/ $\mu$ l): 1134.7

## Spleen (white pulp)

Integrity:

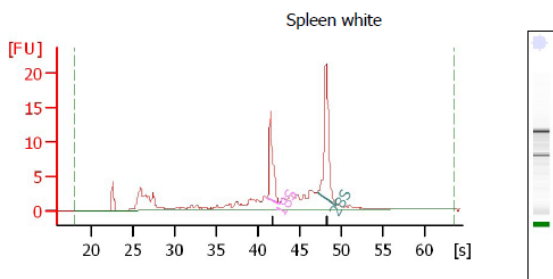

### Overall Results for sample 6 : Spleen white

RNA Area: 118.3  
RNA Concentration: 108 ng/ $\mu$ l  
rRNA Ratio [28s / 18s]: 1.5  
RNA Integrity Number (RIN): 8.1 (B.02.06)  
Result Flagging Color:    
Result Flagging Label: RIN: 8.10

### Fragment table for sample 6 : Spleen white

| Name | Start Time [s] | End Time [s] | Area | % of total Area |
|------|----------------|--------------|------|-----------------|
| 18S  | 41.13          | 42.56        | 15.6 | 13.2            |
| 28S  | 47.12          | 49.47        | 22.9 | 19.4            |

Quantitation and Purity:

260/280: 2.02

260/230: 1.83

Concentration (ng/ $\mu$ l): 928.6

## Synovial Membrane

Integrity:

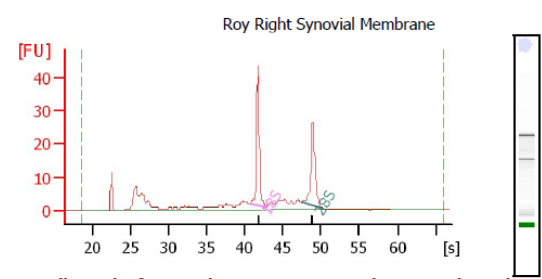

### Overall Results for sample 1 : Roy Right Synovial Membrane

RNA Area: 188.0  
RNA Concentration: 114 ng/ $\mu$ l  
rRNA Ratio [28s / 18s]: 0.9  
RNA Integrity Number (RIN): 8.2 (B.02.06)  
Result Flagging Color:    
Result Flagging Label: RIN: 8.20

### Fragment table for sample 1 : Roy Right Synovial Membrane

| Name | Start Time [s] | End Time [s] | Area | % of total Area |
|------|----------------|--------------|------|-----------------|
| 18S  | 40.64          | 42.85        | 37.2 | 19.8            |
| 28S  | 47.54          | 50.36        | 32.6 | 17.3            |

Quantitation and Purity:

260/280: 2.04

260/230: 2.24

Concentration (ng/ $\mu$ l): 966

## Tendon (super digital flexor, foal)

Integrity:

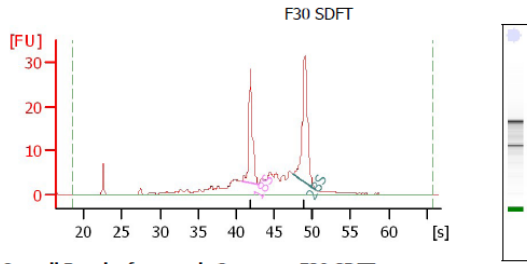

### Overall Results for sample 3 : F30 SDFI

RNA Area: 208.8  
 RNA Concentration: 161 ng/ $\mu$ l  
 rRNA Ratio [28s / 18s]: 1.3  
 RNA Integrity Number (RIN): 8.2 (B.02.06)  
 Result Flagging Color:    
 Result Flagging Label: RIN: 8.20

### Fragment table for sample 3 : F30 SDFI

| Name | Start Time [s] | End Time [s] | Area | % of total Area |
|------|----------------|--------------|------|-----------------|
| 18S  | 40.61          | 42.85        | 35.4 | 16.9            |
| 28S  | 47.48          | 50.48        | 47.2 | 22.6            |

Quantitation and Purity:

260/280: 2.01

260/230: 2.12

Concentration (ng/ $\mu$ l): 497

## Thymus

Integrity:

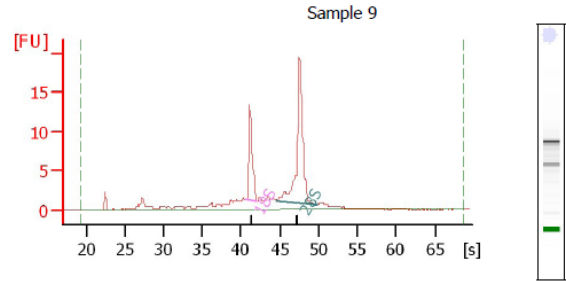

### Overall Results for sample 9 : Sample 9

RNA Area: 97.2  
 RNA Concentration: 140 ng/ $\mu$ l  
 rRNA Ratio [28s / 18s]: 2.2  
 RNA Integrity Number (RIN): 8.8 (B.02.06)  
 Result Flagging Color:    
 Result Flagging Label: RIN: 8.80

### Fragment table for sample 9 : Sample 9

| Name | Start Time [s] | End Time [s] | Area | % of total Area |
|------|----------------|--------------|------|-----------------|
| 18S  | 40.67          | 42.11        | 15.3 | 15.8            |
| 28S  | 44.60          | 49.73        | 34.0 | 35.0            |

Quantitation and Purity:

260/280: 2.01

260/230: 2.00

Concentration (ng/ $\mu$ l): 533.83

## Testes

Integrity:

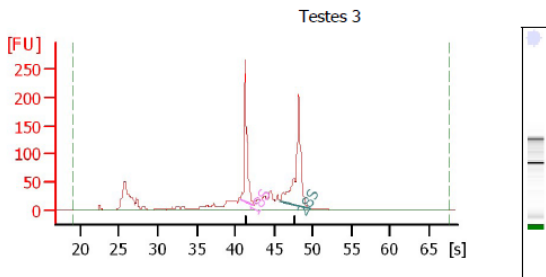

### Overall Results for sample 9 : Testes 3

RNA Area: 1,387.9  
 RNA Concentration: 840 ng/ $\mu$ l  
 rRNA Ratio [28s / 18s]: 1.4  
 RNA Integrity Number (RIN): 8.5 (B.02.06)  
 Result Flagging Color:    
 Result Flagging Label: RIN: 8.50

### Fragment table for sample 9 : Testes 3

| Name | Start Time [s] | End Time [s] | Area  | % of total Area |
|------|----------------|--------------|-------|-----------------|
| 18S  | 40.64          | 42.40        | 237.1 | 17.1            |
| 28S  | 45.83          | 49.66        | 337.8 | 24.3            |

Quantitation and Purity:

260/280: 2.05

260/230: 1.91

Concentration (ng/ $\mu$ l): 1434

## Vena Cava

Integrity:

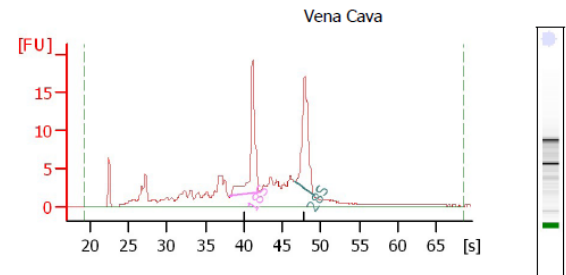

### Overall Results for sample 11 : Vena Cava

RNA Area: 193.0  
 RNA Concentration: 113 ng/ $\mu$ l  
 rRNA Ratio [28s / 18s]: 0.9  
 RNA Integrity Number (RIN): 7.6 (B.02.06)  
 Result Flagging Color:    
 Result Flagging Label: RIN: 7.60

### Fragment table for sample 11 : Vena Cava

| Name | Start Time [s] | End Time [s] | Area | % of total Area |
|------|----------------|--------------|------|-----------------|
| 18S  | 38.10          | 42.12        | 30.9 | 16.0            |
| 28S  | 46.69          | 49.22        | 26.8 | 13.9            |

Quantitation and Purity:

260/280: 2.04

260/230: 2.19

Concentration (ng/ $\mu$ l): 500
