# Supplementary material for: Annotation of the Protein Coding Regions of the Equine Genome
Source: PubMed Central journal article supplement (PMC4481266; doi:10.1371/journal.pone.0124375), 2015-06-24

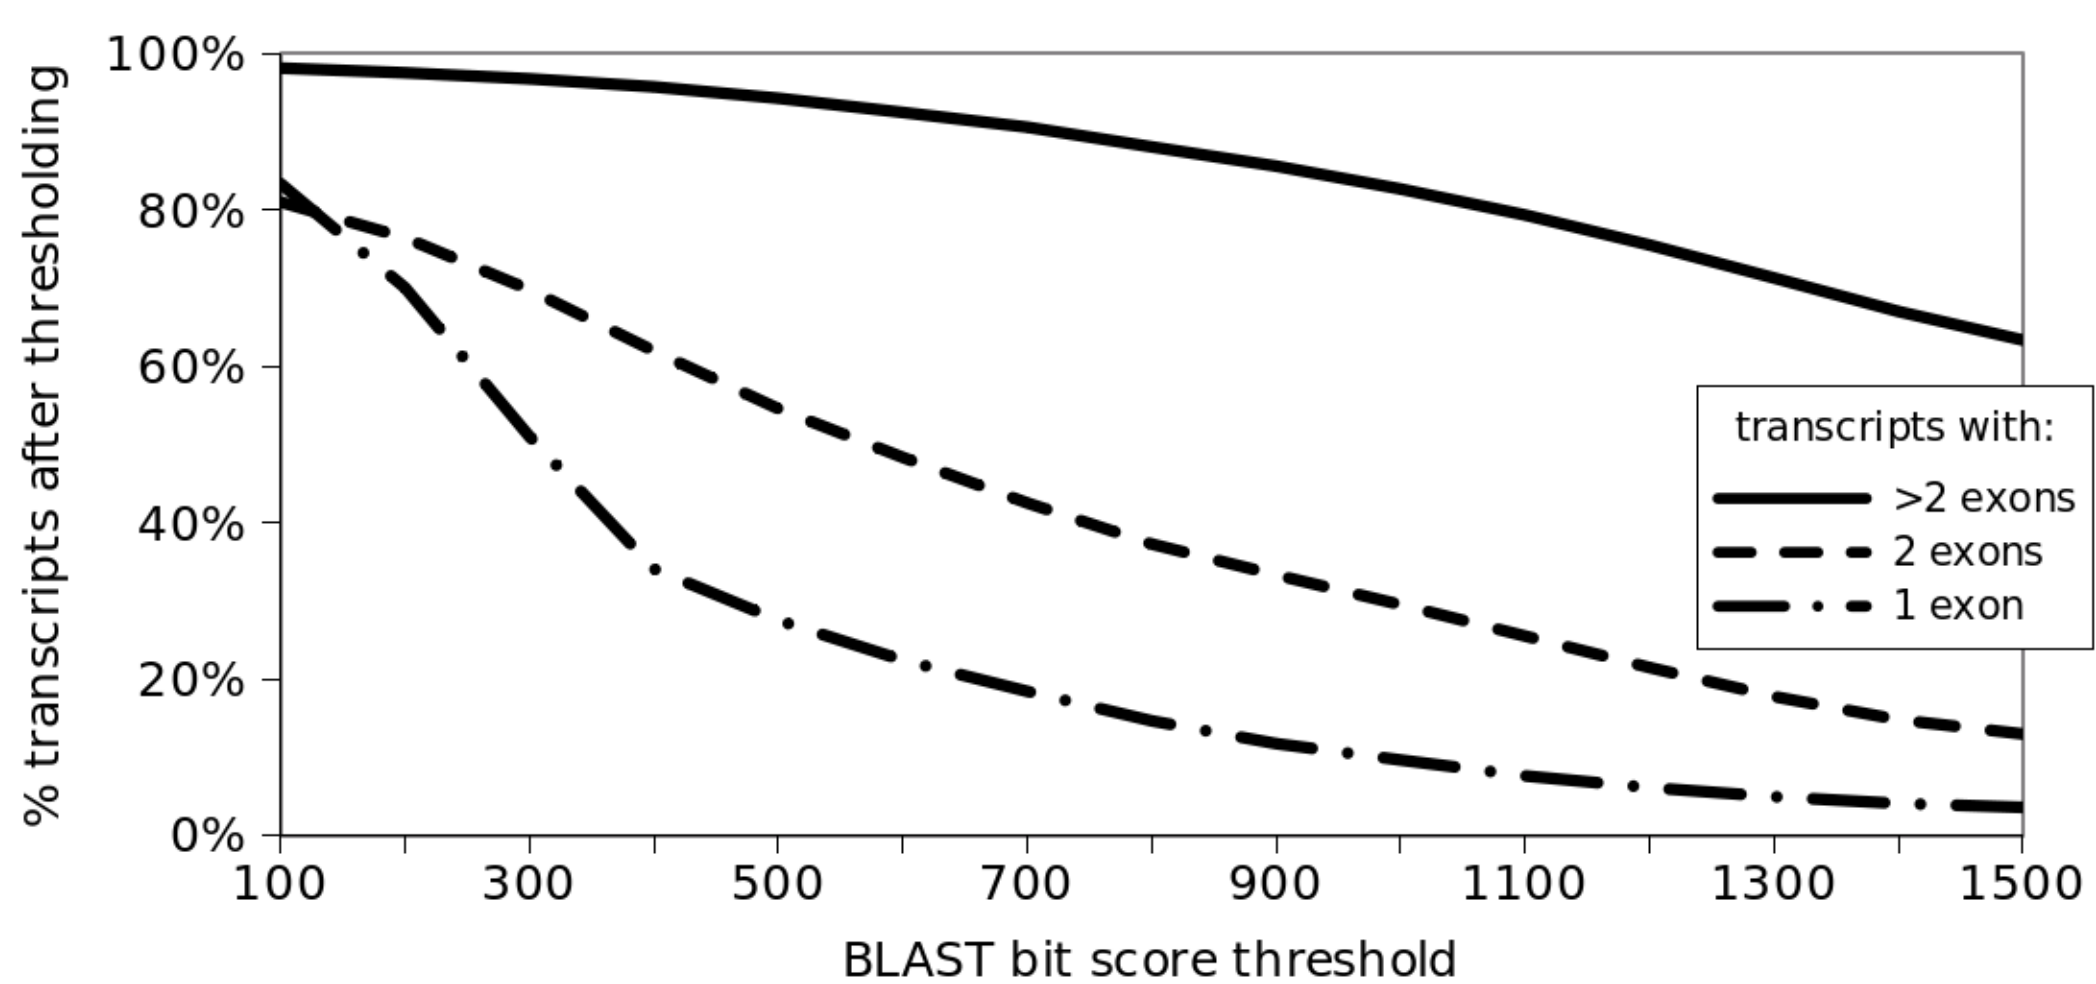

Supplement: pone.0124375.s003.pdf [file pone.0124375.s003.pdf]
